# Supplementary material for: Measurement of mitochondrial respiration in permeabilized fish gills
Source: PubMed Central journal article supplement (PMC7044462; doi:10.1242/jeb.216762), 2020-02-19
Supplement: jexbio-223-216762-s1.pdf [file jexbio-223-216762-s1.pdf]

**Table S1.** Variability between duplicate measurements and statistical results used in repeatability assessment of duplicate mitochondrial preparations. Repeatability was calculated as described in Lessells and Boag (1986).

| <b>Gill Tissue Measurement</b>                                | <b>% Difference</b> | <b>Sum of Squares Among Groups</b> | <b>Mean Squares Among Groups</b> | <b>Sum of Squares Within Groups</b> | <b>Mean Squares Within Groups</b> | <b>F<sub>dfa*,dfw†</sub></b> | <b>Repeatability</b> |
|---------------------------------------------------------------|---------------------|------------------------------------|----------------------------------|-------------------------------------|-----------------------------------|------------------------------|----------------------|
| <b>Enzyme Activity</b>                                        |                     |                                    |                                  |                                     |                                   |                              |                      |
| Citrate Synthase (U*g tissue <sup>-1</sup> )                  | 3.97 %              | 0.93                               | 0.133                            | 0.172                               | 0.0215                            | 6.326 <sub>7,8</sub>         | 0.607                |
| Cytochrome c Oxidase (U*g tissue <sup>-1</sup> )              | 0.56 %              | 2.18                               | 0.311                            | 0.418                               | 0.0522                            | 5.762 <sub>7,8</sub>         | 0.618                |
| <b>Mitochondrial Respiration</b>                              |                     |                                    |                                  |                                     |                                   |                              |                      |
| L <sub>N</sub> (pmol*min <sup>-1</sup> *mg <sup>-1</sup> )    | 7.56 %              | 7224                               | 1032                             | 7574.4                              | 946.8                             | 1.090 <sub>7,8</sub>         | 0.989                |
| P <sub>PM</sub> (pmol*min <sup>-1</sup> *mg <sup>-1</sup> )   | 2.98 %              | 72128                              | 10304                            | 13832                               | 1729                              | 5.751 <sub>7,8</sub>         | 0.617                |
| P <sub>PMG</sub> (pmol*min <sup>-1</sup> *mg <sup>-1</sup> )  | 3.08 %              | 119903                             | 17129                            | 22008                               | 2751                              | 6.226 <sub>7,8</sub>         | 0.605                |
| P <sub>PMGS</sub> (pmol*min <sup>-1</sup> *mg <sup>-1</sup> ) | 1.55 %              | 161371                             | 23053                            | 50632                               | 6329                              | 3.642 <sub>7,8</sub>         | 0.752                |
| L <sub>Omy</sub> (pmol*min <sup>-1</sup> *mg <sup>-1</sup> )  | 12.18 %             | 4865                               | 608                              | 1820                                | 260                               | 0.428 <sub>7,8</sub>         | 0.857                |
| P <sub>TM</sub> (pmol*min <sup>-1</sup> *mg <sup>-1</sup> )   | 13.19 %             | 62048                              | 8864                             | 49704                               | 6213                              | 1.427 <sub>7,8</sub>         | 0.949                |
| <b>Quality of Mitochondrial Preparation</b>                   |                     |                                    |                                  |                                     |                                   |                              |                      |
| RCR (P <sub>PM</sub> /L <sub>N</sub> )                        | 1.51 %              | 13.265                             | 1.895                            | 9.008                               | 1.126                             | 1.683 <sub>7,8</sub>         | 0.921                |
| RCR (P <sub>PM</sub> /L <sub>Omy</sub> )                      | 9.92 %              | 43.428                             | 6.204                            | 9.368                               | 1.171                             | 5.299 <sub>7,8</sub>         | 0.650                |
| RCR (P <sub>PMGS</sub> /L <sub>Omy</sub> )                    | 0.85 %              | 33.313                             | 4.759                            | 17.760                              | 2.220                             | 2.144 <sub>7,8</sub>         | 0.875                |

\**dfa* is the degrees of freedom amongst groups, †*dfw* is the degrees of freedom within groups
